# Supplementary material
Source: PubMed Central journal article supplement (PMC2799787)
Supplement: NIHMS155841-supplement-supp_figs.pdf [file NIHMS155841-supplement-supp_figs.pdf]

**A**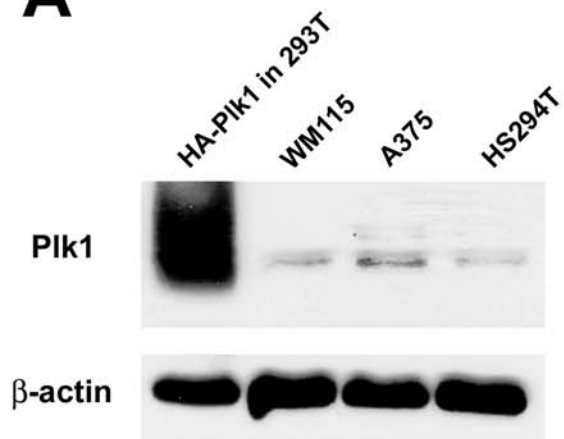

Blot incubated with  
mouse anti-Plk1

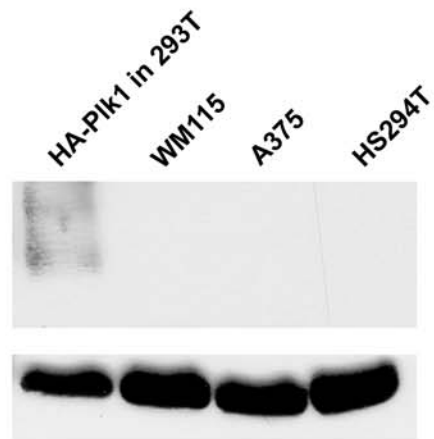

Blot incubated with  
mouse anti-Plk1 +  
recombinant Plk1

**B**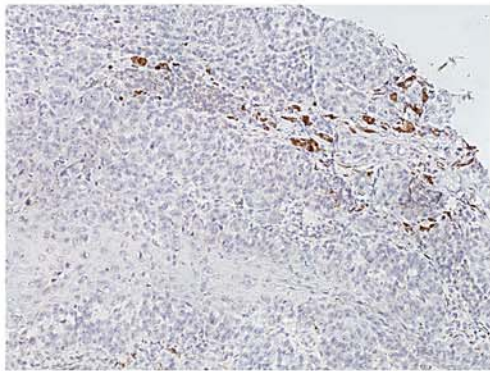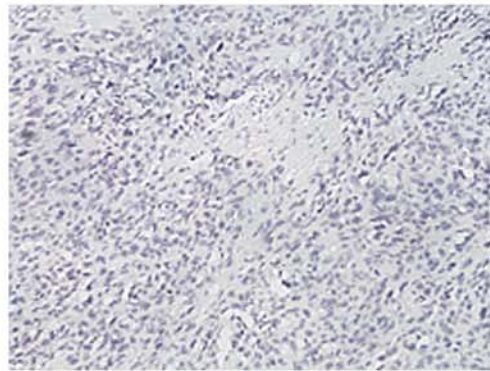**C**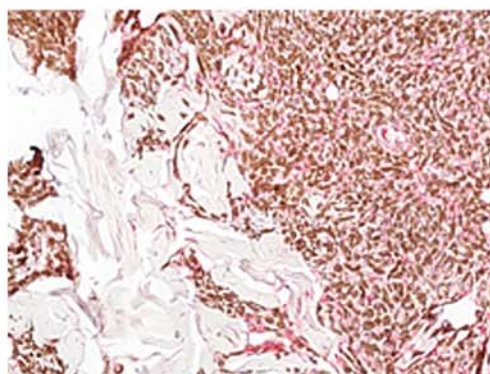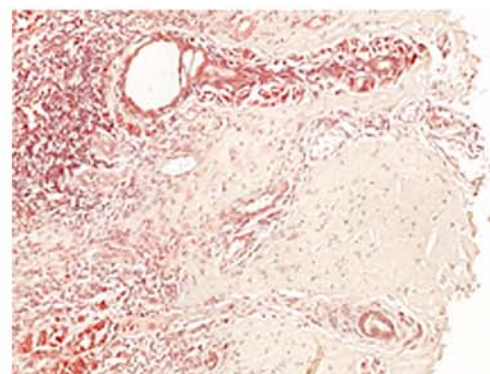**D**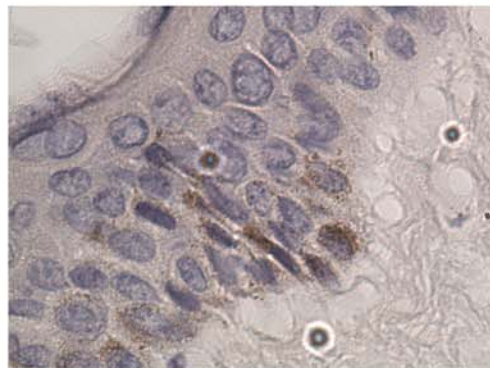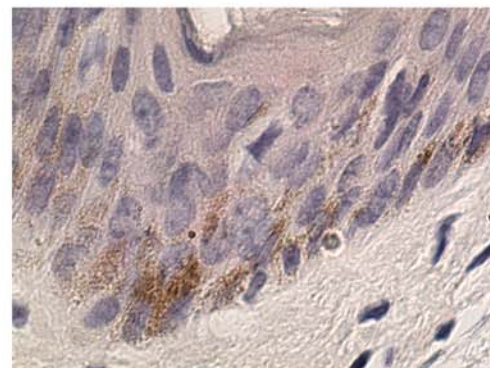

Figure S-1

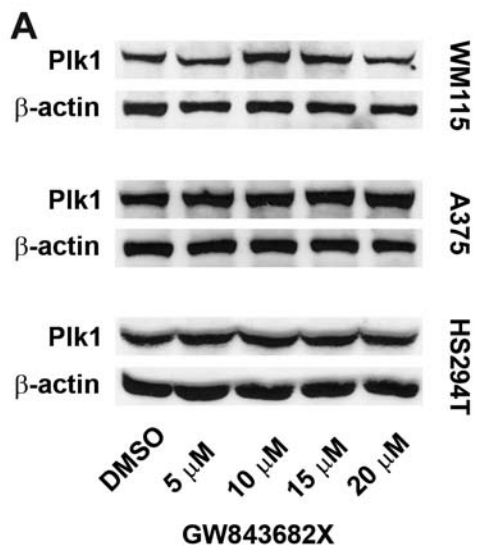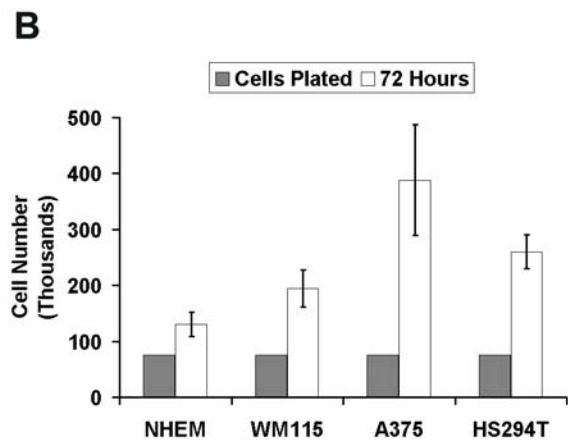

Figure S-2

# GW843682X

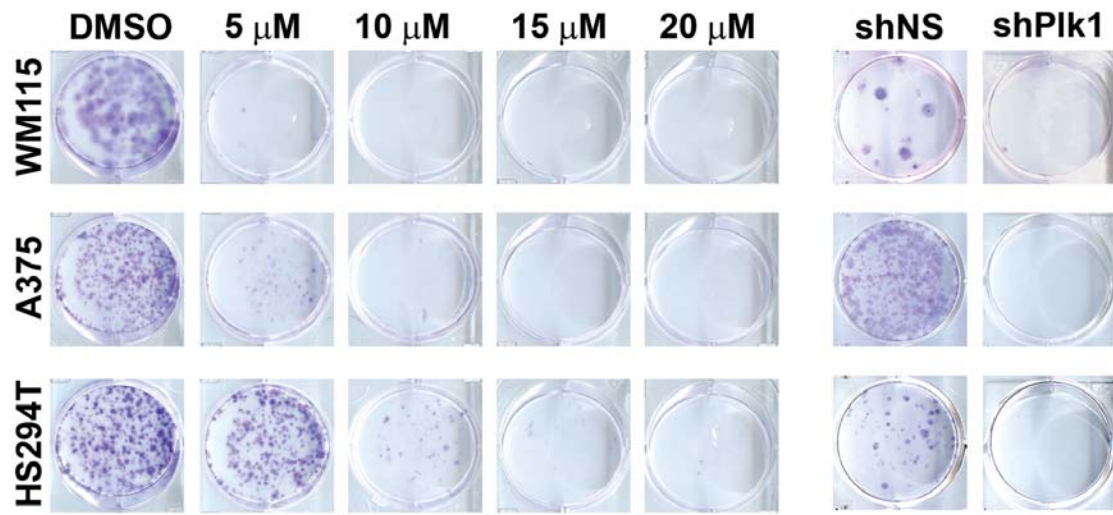

Figure S-3

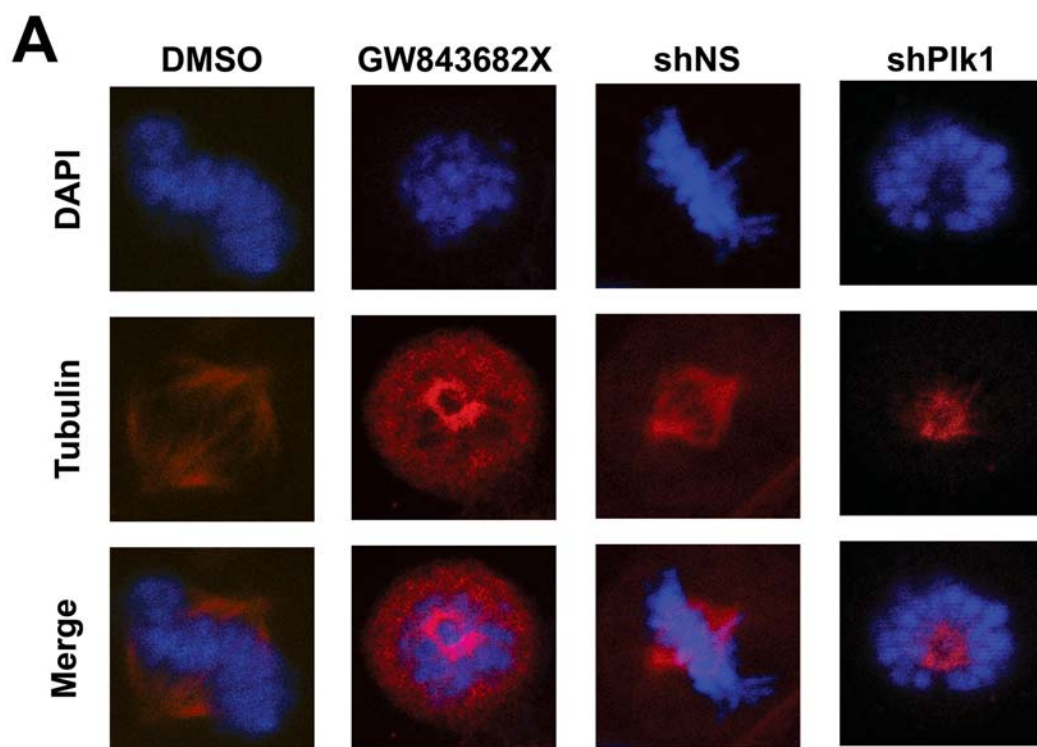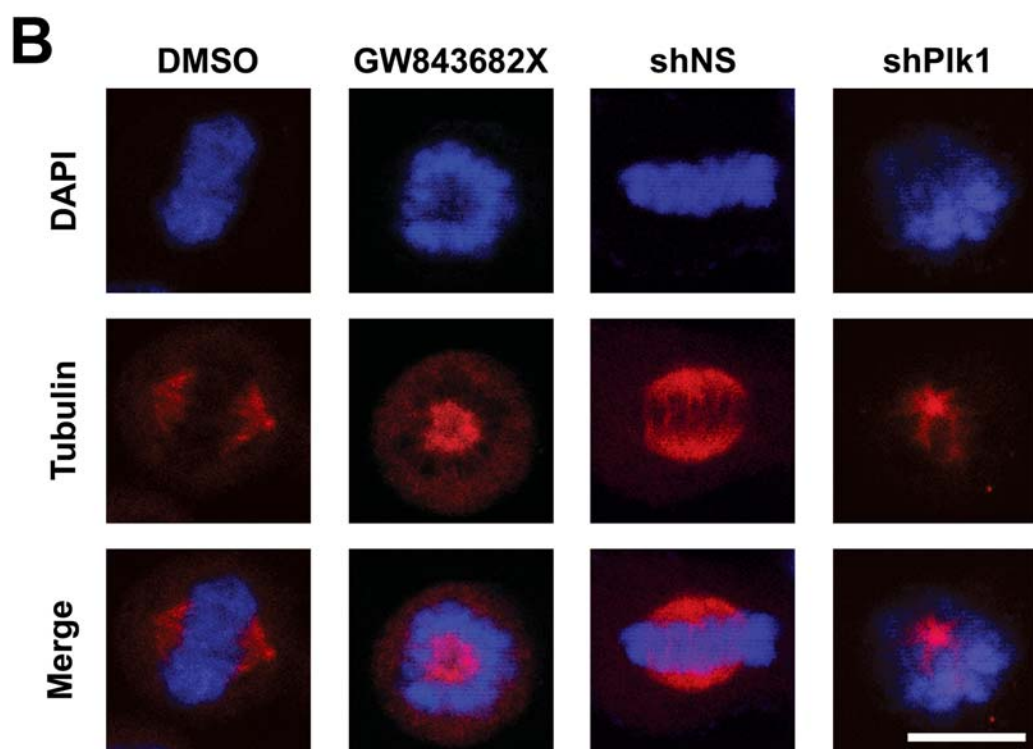

Figure S-4
